# Supplementary material for: In Silico and In Vitro Study of Janus Kinases Inhibitors from Naphthoquinones
Source: MDPI journal article supplement (doi:10.3390/molecules28020597), 2023-01-06
Supplement: s1 [file s1]

# Supporting Information

## ***In silico and in vitro* study of Janus kinases inhibitors from naphthoquinones**

Kamonpan Sanachai<sup>1</sup>, Panupong Mahalapbutr<sup>2</sup>, Luecha Tabtimmai<sup>3</sup>, Supaphorn Seetaha<sup>4</sup>, Nantawat Kaekratoke<sup>5</sup>, Supakarn Chamni<sup>6,7</sup>, Syed Sikander Azam<sup>8</sup>, Kiattawee Choowongkomon<sup>4,\*</sup>, Thanyada Rungrotmongkol<sup>1,9,\*</sup>

<sup>1</sup> Center of Excellence in Biocatalyst and Sustainable Biotechnology, Department of Biochemistry, Faculty of Science, Chulalongkorn University, Bangkok 10330, Thailand

<sup>2</sup> Department of Biochemistry, Faculty of Medicine, Khon Kaen University, Khon Kaen 40002, Thailand

<sup>3</sup> Department of Biotechnology, Faculty of Applied Science, King Mongkut's University of Technology of North Bangkok, Bangkok 10800, Thailand

<sup>4</sup> Department of Biochemistry, Faculty of Science, Kasetsart University, Bangkok 10900, Thailand

<sup>5</sup> Department of Materials Science and Engineering, Vidyasirimedhi Institute of Science and Technology (VISTEC), Rayong, 21210, Thailand

<sup>6</sup> Department of Pharmacognosy and Pharmaceutical Botany, Faculty of Pharmaceutical Sciences, Chulalongkorn University, Bangkok 10330, Thailand

<sup>7</sup> Natural products and Nanoparticles Research Unit (NP2), Faculty of Pharmaceutical Sciences, Chulalongkorn University, Bangkok 10330, Thailand

<sup>8</sup> Computational Biology Lab, National Center for Bioinformatics, Quaid-i-Azam University, Islamabad, Pakistan

<sup>9</sup> Program in Bioinformatics and Computational Biology, Graduate School, Chulalongkorn University, Bangkok 10330, Thailand

\* Correspondences: t.rungrotmongkol@gmail.com (T.R.) and fsciktc@ku.ac.th (K.C.); Tel.: +66 2 2185426 (T.R.)

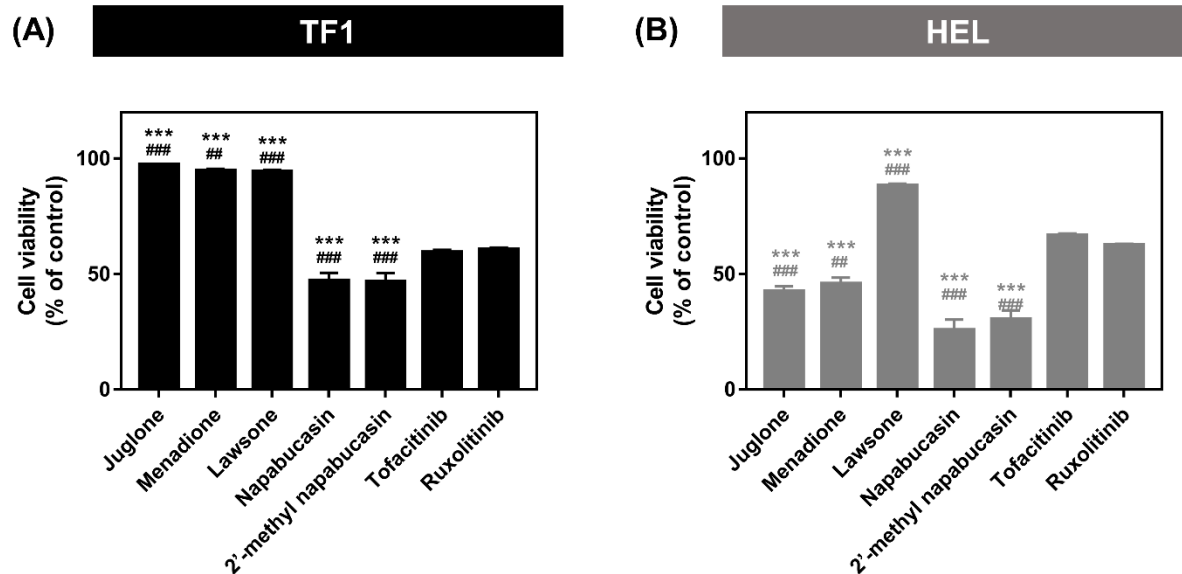

**Figure S1.** Cytotoxicity of naphthoquinones at 10  $\mu$ M against TF1 and HEL cells by Presto Blue assay.  
 \*\*\*  $p \leq 0.001$  vs. tofacitinib, #  $p \leq 0.01$  and ###  $p \leq 0.001$  vs. ruxolitinib.

# TF1

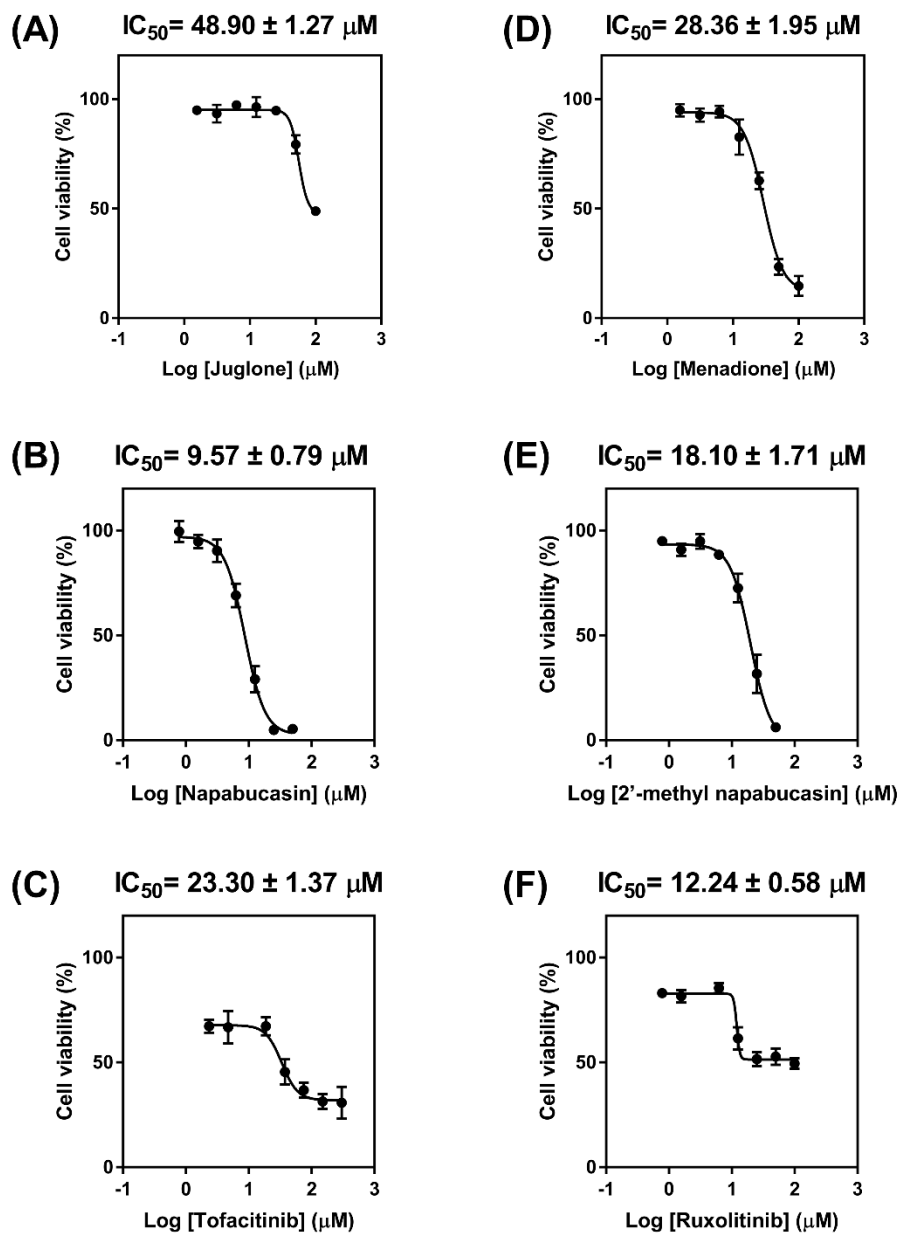

**Figure S2.**  $IC_{50}$  for cell viability inhibition of naphthoquinones and known drugs (tofacitinib and ruxolitinib) in TF1 cells by Presto Blue assay.

# HEL

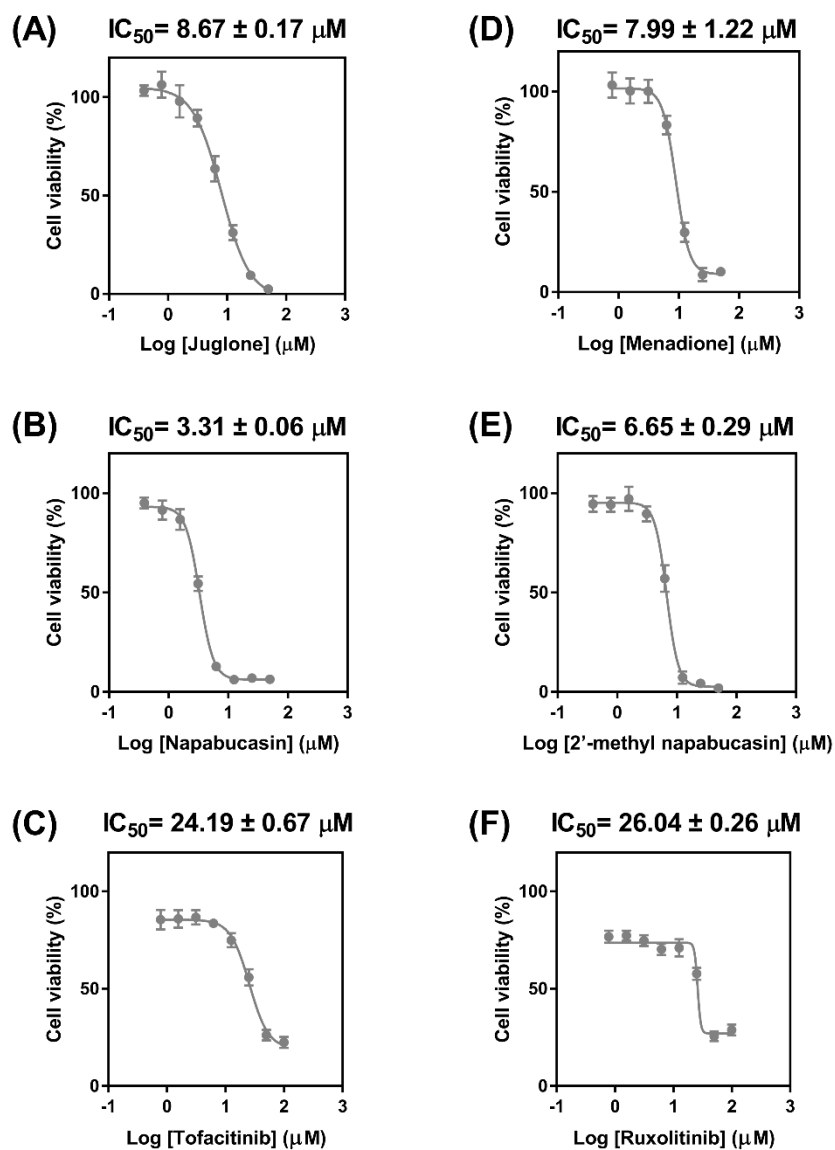

**Figure S3.**  $IC_{50}$  for cell viability inhibition of naphthoquinones and known drugs (tofacitinib and ruxolitinib) in HEL cells by Presto Blue assay.

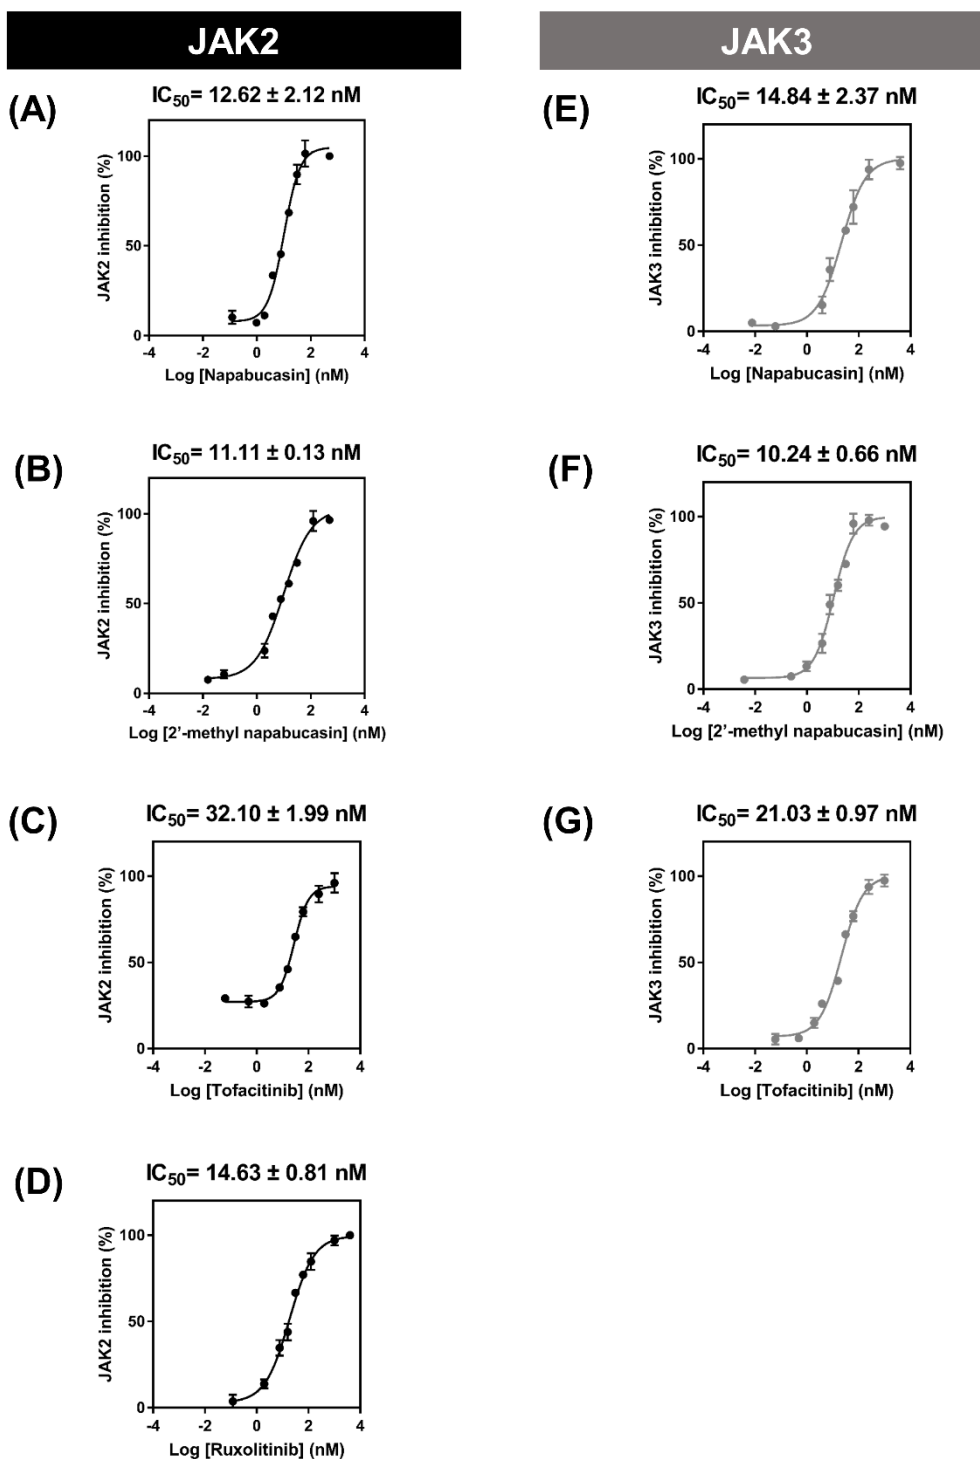

**Figure S4.**  $IC_{50}$  for JAK2/3 inhibitions of napabucasin and 2'-methyl napabucasin comparisons with known drugs, tofacitinib and ruxolitinib by ADP-Glo™ kinase assay.

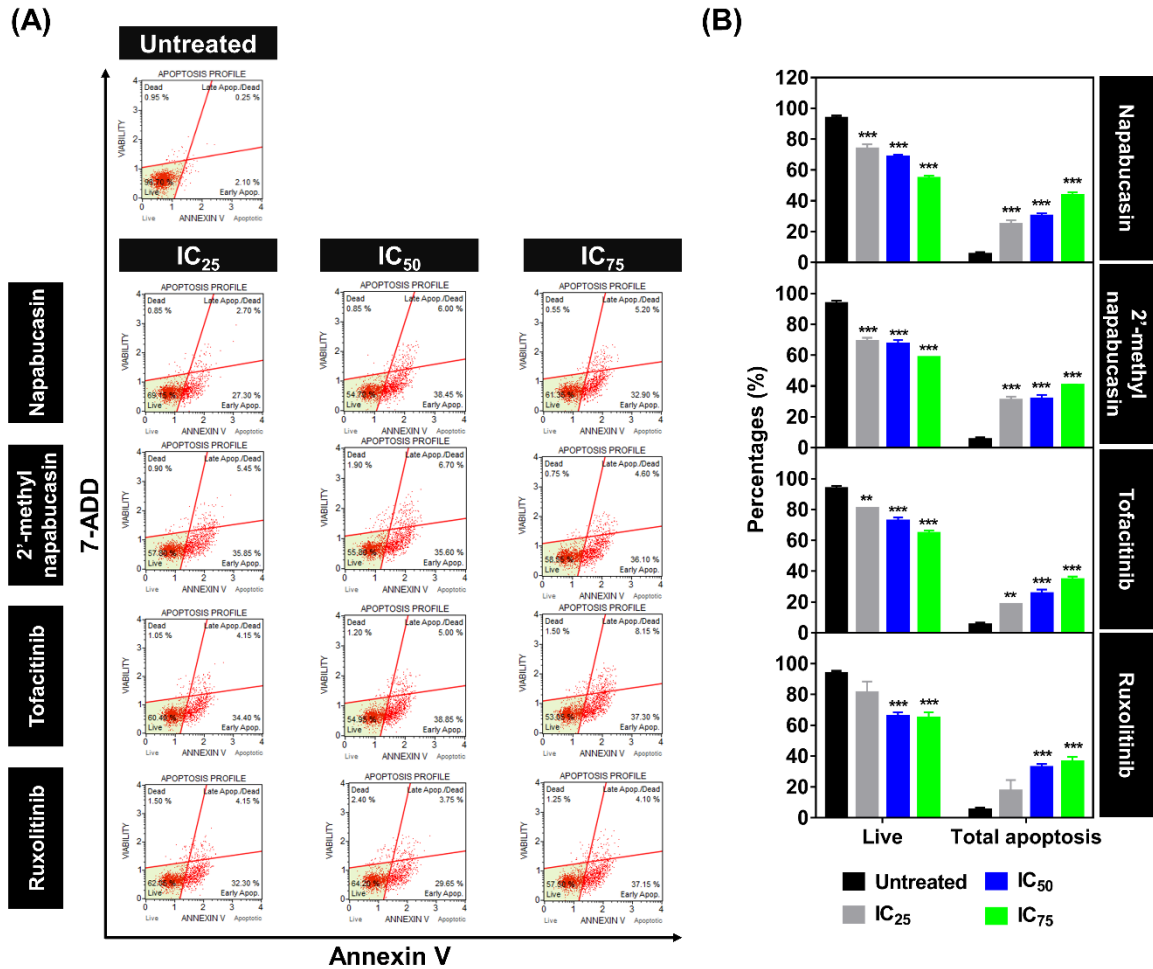

**Figure S5.** Dose-dependent effect of napabucasin and 2'-methyl napabucasin comparison with drugs, tofacitinib and ruxolitinib at IC<sub>25</sub>, IC<sub>50</sub> and IC<sub>75</sub> values (nM) on the apoptosis of TF1 cells by annexin V for 24 h. (A) The flow cytometry dot plot of each group which divided into four quadrants: live cells, early apoptotic cells, late apoptotic cells, and necrotic cells. (B) The percentages of live cells and apoptotic cells. \* $p \leq 0.05$ , \*\* $p \leq 0.01$  and \*\*\* $p \leq 0.001$  compared with the untreated group.

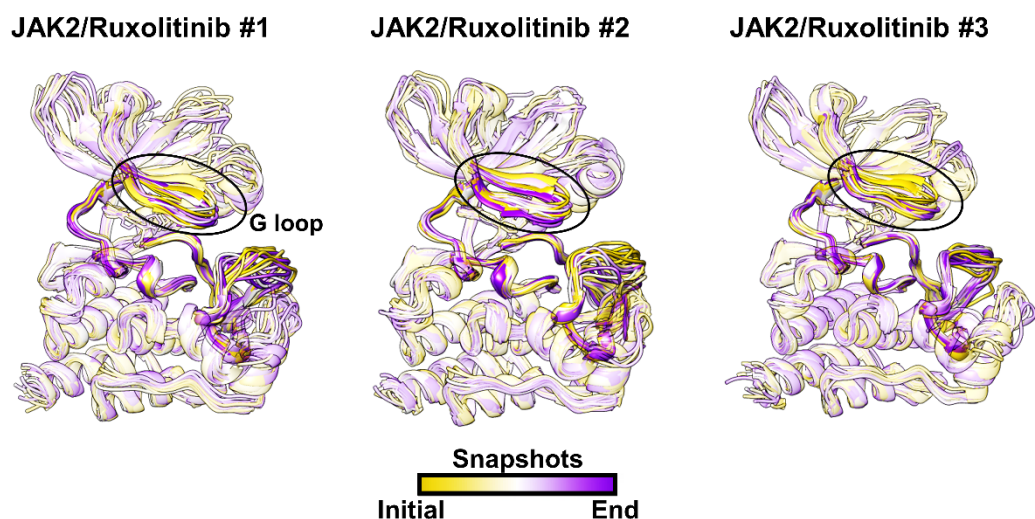

**Figure S6.** Snapshot per time (25 frames) of complex between JAK2 and ruxolitinib along 500 ns simulations.

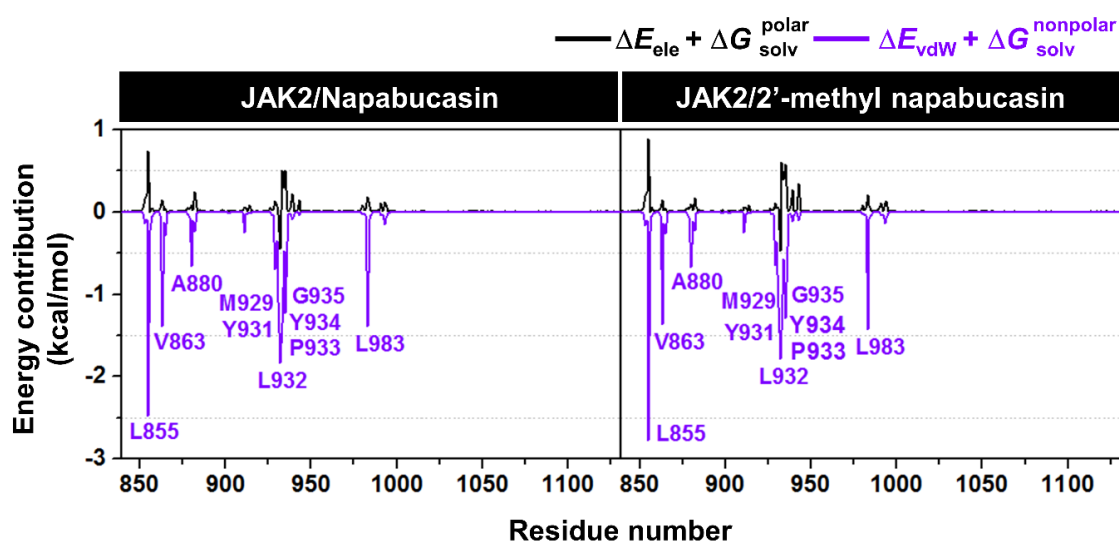

**Figure S7.** Energy contribution between napabucasin series within JAK2 in ATP binding pocket from the average three independent simulations (last 100 ns).

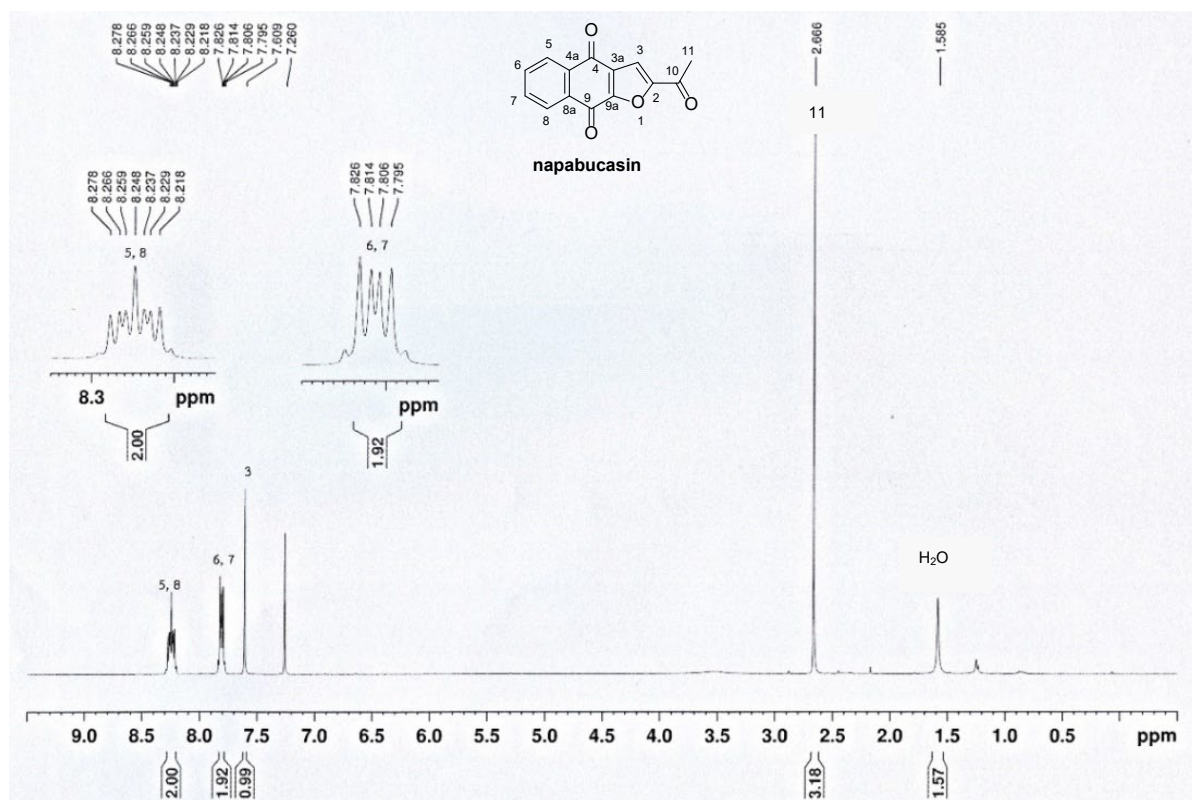

Figure S8.  $^1\text{H}$  NMR (300 MHz) spectrum of napabucasin in  $\text{CDCl}_3$ .

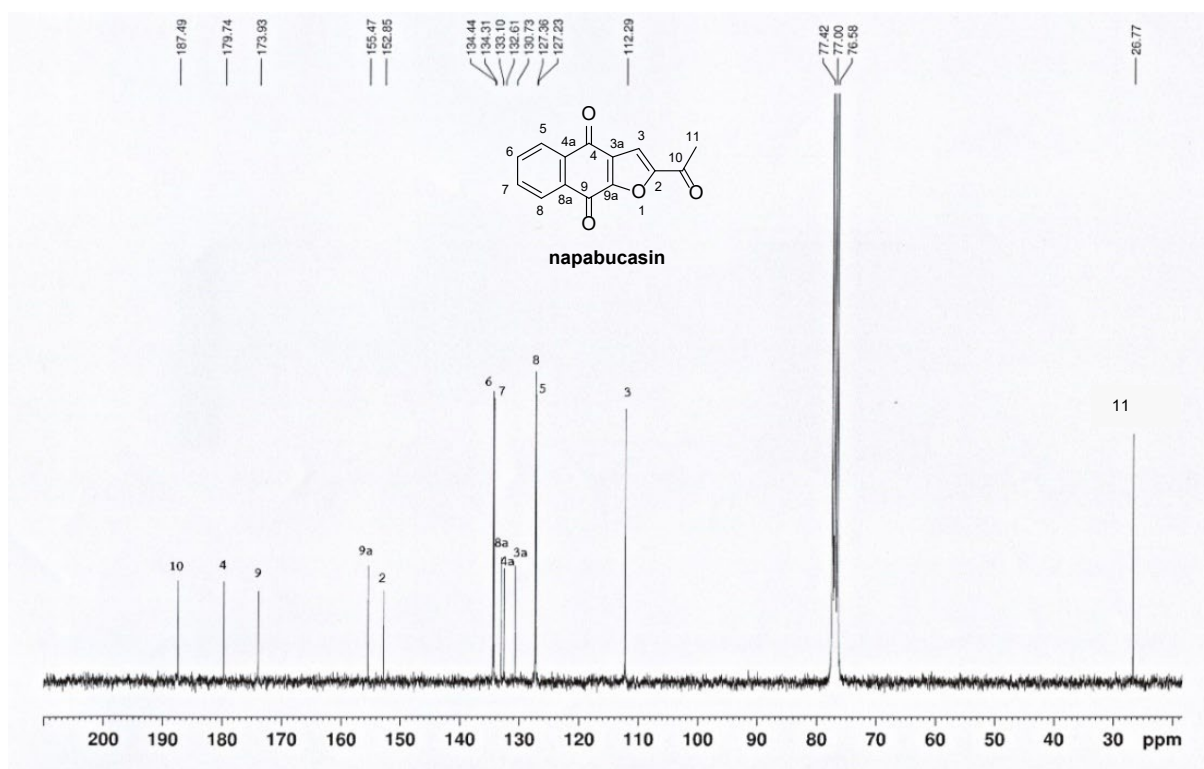

Figure S9.  $^{13}\text{C}$  NMR (100 MHz) spectrum of napabucasin in  $\text{CDCl}_3$ .



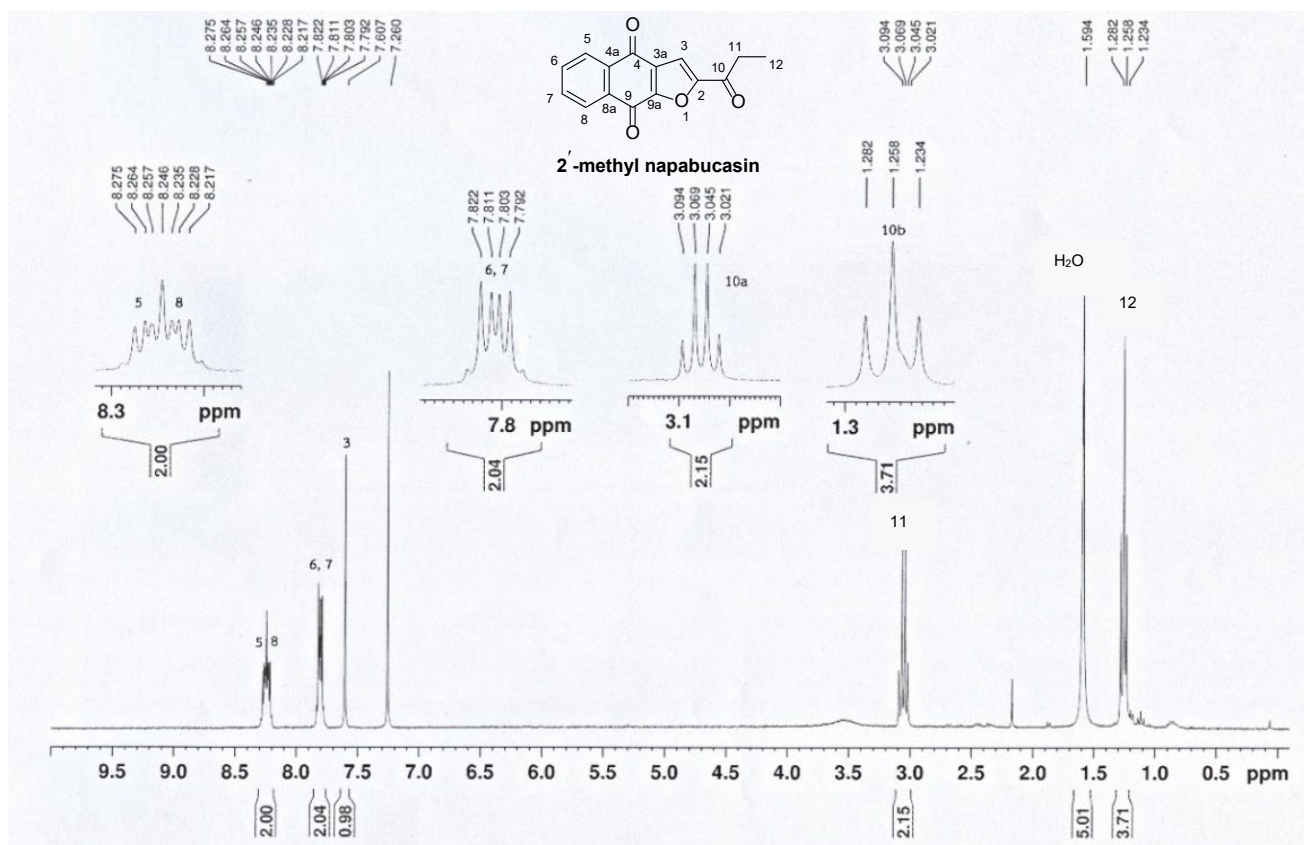

**Figure S10.** <sup>1</sup>H NMR (300 MHz) spectrum of 2'-methyl napabucasin in CDCl<sub>3</sub>.

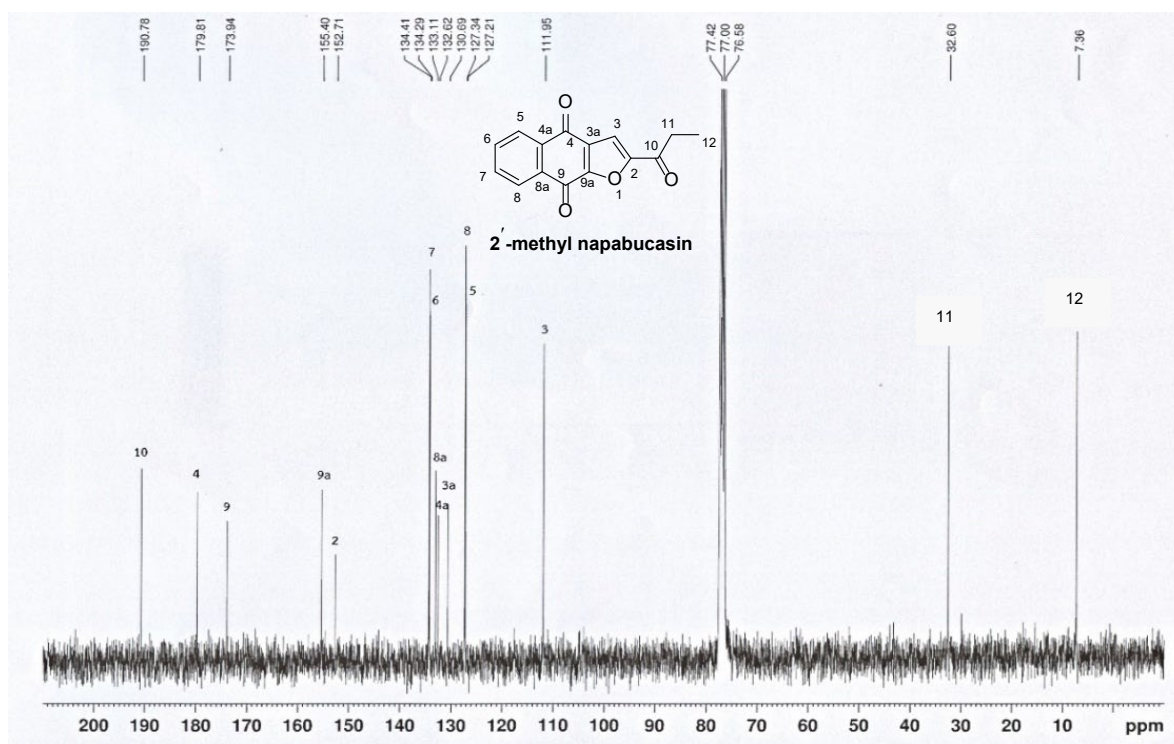

**Figure S11.** <sup>13</sup>C NMR (100 MHz) spectrum of 2'-methyl napabucasin in CDCl<sub>3</sub>.
